# Supplementary material
Source: PubMed Central journal article supplement (PMC8415092)

List of Included Studies

| Study or Subgroup     | Experimental Arm |       | Control Arm |       | Weight        | Risk Difference             | Risk Difference |
|-----------------------|------------------|-------|-------------|-------|---------------|-----------------------------|-----------------|
|                       | Events           | Total | Events      | Total |               | 95% CI                      | 95% CI          |
| Study 1               | 10               | 20    | 15          | 25    | 1.3%          | -0.10 [-0.39, 0.19]         |                 |
| Study 2               | 30               | 70    | 40          | 80    | 4.2%          | -0.07 [-0.23, 0.09]         |                 |
| Study 3               | 100              | 200   | 125         | 200   | 11.3%         | -0.13 [-0.22, -0.03]        |                 |
| Study 4               | 200              | 400   | 450         | 700   | 28.8%         | -0.14 [-0.20, -0.08]        |                 |
| Study 5               | 600              | 800   | 1000        | 1200  | 54.4%         | -0.08 [-0.12, -0.05]        |                 |
| <b>Total (95% CI)</b> | <b>1490</b>      |       | <b>2205</b> |       | <b>100.0%</b> | <b>-0.10 [-0.13, -0.08]</b> |                 |
| Total events          | 940              |       | 1630        |       |               |                             |                 |

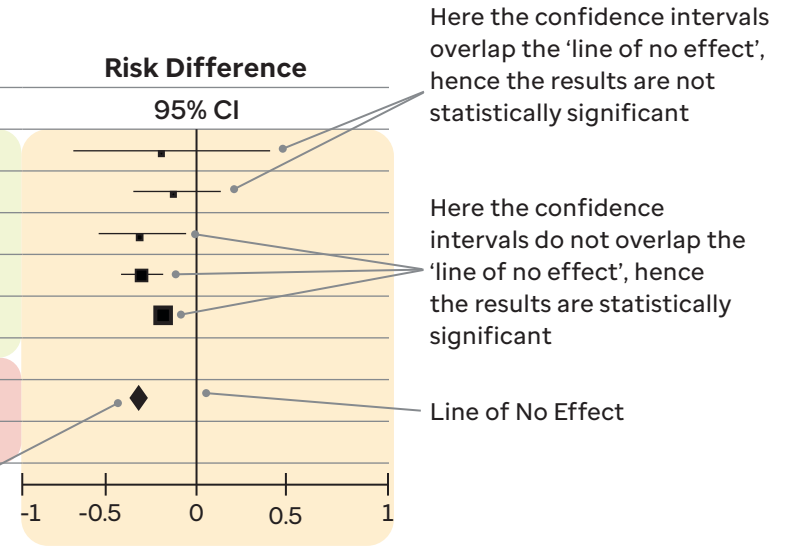

Supplement: NIHMS1666834-supplement-1.pdf [file NIHMS1666834-supplement-1.pdf]
