# Supplementary material
Source: PubMed Central journal article supplement (PMC8415092)

### No potential publication bias

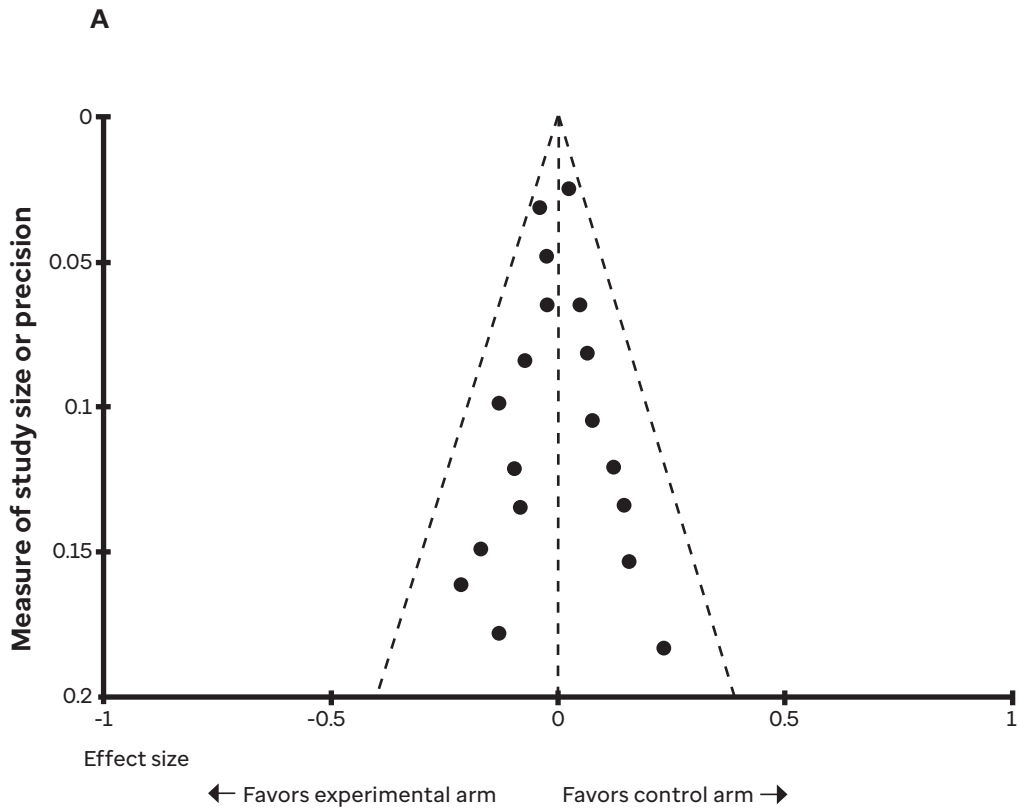

### Potential for publication bias

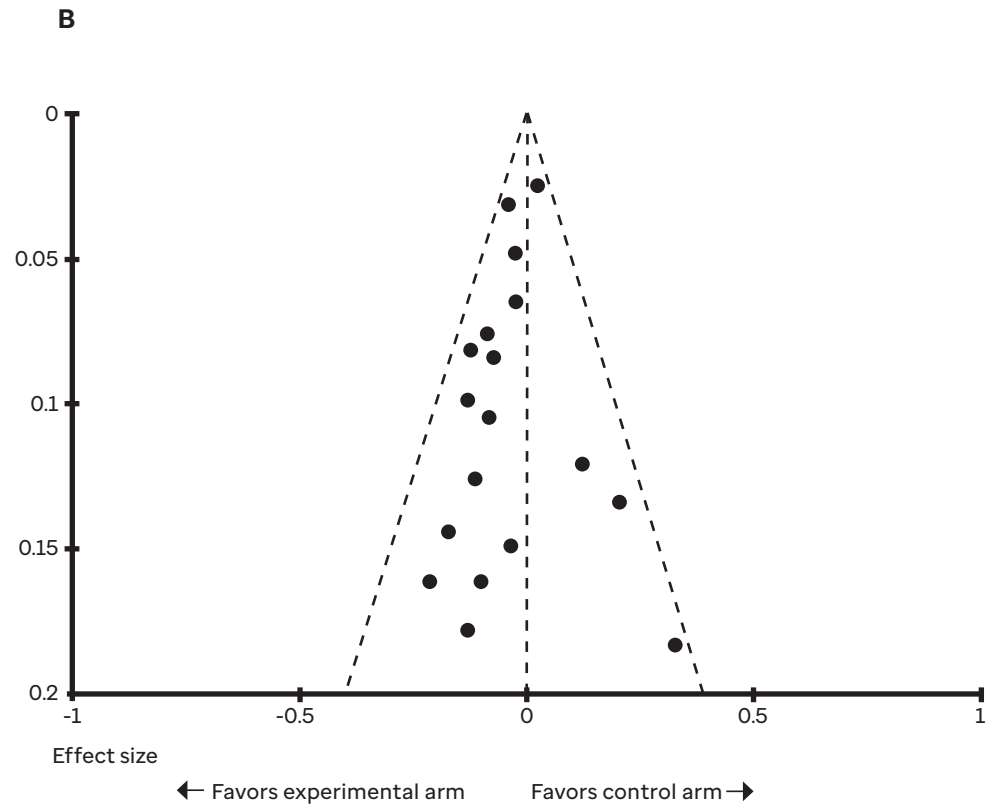

Supplement: NIHMS1666834-supplement-2.pdf [file NIHMS1666834-supplement-2.pdf]
